# Supplementary material for: Cytokine Profiling in Plasma from Patients with Brain Tumors Versus Healthy Individuals using 2 Different Multiplex Immunoassay Platforms
Source: PubMed Central journal article supplement — Biomark Insights. 2021 Mar 30;16:11772719211006666. doi: 10.1177/11772719211006666 (PMC8013708; doi:10.1177/11772719211006666), 2021-03-30
Supplement: sj-pdf-1-bmi-10.1177_11772719211006666.pdf [file sj-pdf-1-bmi-10.1177_11772719211006666.pdf]

**Supplemental Table 1.** Cytokine levels measured by a planar electrochemiluminescence multiplex assay in plasma samples from healthy controls (HC; n=11), subjects with secondary brain metastases from other organs (BrMet; n=17), and individuals with glioblastoma (GBM; n=27). Concentrations are shown as mean pg/mL  $\pm$  SD. P-values were determined by one-way ANOVA adjusted for multiple comparisons using Tukey test. Differences from HC that are not significant are labeled “ns”. **Bolded** analyte concentrations are significantly different between multiplex assay platforms.

| Cytokine       | HC Conc.<br>pg/mL $\pm$ SD | BrMet Conc.<br>pg/mL $\pm$ SD       | % of HC | P-value<br>vs HC | GBM Conc.<br>pg/mL $\pm$ SD         | % of HC | P-value<br>vs HC |
|----------------|----------------------------|-------------------------------------|---------|------------------|-------------------------------------|---------|------------------|
| GM-CSF         | 0.11 $\pm$ 0.05            | <b>0.06 <math>\pm</math> 0.04</b>   | 54.5%   | 0.0002           | <b>0.04 <math>\pm</math> 0.02</b>   | 36.4%   | <0.0001          |
| IFN- $\gamma$  | 3.97 $\pm$ 1.59            | 2.89 $\pm$ 3.86                     | 72.8%   | ns               | <b>0.64 <math>\pm</math> 0.87</b>   | 16.1%   | 0.001            |
| IL-1 $\beta$   | 0.03 $\pm$ 0.03            | <b>0.15 <math>\pm</math> 0.09</b>   | 500%    | 0.0004           | <b>0.10 <math>\pm</math> 0.07</b>   | 333%    | 0.043            |
| IL-2           | 0.15 $\pm$ 0.16            | 0.10 $\pm$ 0.17                     | 66.6%   | ns               | 0.07 $\pm$ 0.11                     | 46.7%   | ns               |
| IL-4           | 0.004 $\pm$ 0.005          | 0.007 $\pm$ 0.006                   | 175%    | ns               | 0.005 $\pm$ 0.005                   | 125%    | ns               |
| IL-5           | 0.41 $\pm$ 0.28            | <b>0.09 <math>\pm</math> 0.09</b>   | 21.9%   | <0.0001          | <b>0.06 <math>\pm</math> 0.04</b>   | 14.6%   | <0.0001          |
| IL-6           | 0.78 $\pm$ 0.19            | <b>1.70 <math>\pm</math> 1.05</b>   | 218%    | 0.041            | 1.43 $\pm$ 0.97                     | 183%    | ns               |
| IL-7           | 0.57 $\pm$ 0.23            | <b>10.41 <math>\pm</math> 5.06</b>  | 183%    | <0.0001          | <b>10.39 <math>\pm</math> 5.26</b>  | 182%    | <0.0001          |
| IL-8           | 3.30 $\pm$ 1.44            | <b>13.21 <math>\pm</math> 12.12</b> | 400%    | 0.0038           | 7.03 $\pm$ 3.59                     | 213%    | ns               |
| IL-10          | 0.23 $\pm$ 0.07            | 4.78 $\pm$ 4.30                     | 2078%   | ns               | <b>8.20 <math>\pm</math> 10.81</b>  | 3565%   | 0.021            |
| IL-12 p70      | 0.12 $\pm$ 0.09            | 0.11 $\pm$ 0.08                     | 91.7%   | ns               | 0.09 $\pm$ 0.08                     | 75%     | ns               |
| IL-13          | 0.09 $\pm$ 0.13            | 0.34 $\pm$ 0.51                     | 378%    | ns               | 0.23 $\pm$ 0.30                     | 256%    | ns               |
| IL-17A         | 0.95 $\pm$ 0.48            | 0.69 $\pm$ 0.62                     | 72.6%   | ns               | <b>0.30 <math>\pm</math> 0.20</b>   | 31.6%   | 0.0006           |
| IL-21          | 0.00 $\pm$ 0.00            | 0.00 $\pm$ 0.00                     | 0%      | ns               | 0.00 $\pm$ 0.00                     | 0%      | ns               |
| IL-23          | 0.22 $\pm$ 0.64            | 0.05 $\pm$ 0.16                     | 22.7%   | ns               | 0.07 $\pm$ 0.17                     | 31.8%   | ns               |
| MIP-1 $\alpha$ | 7.13 $\pm$ 3.11            | 8.60 $\pm$ 4.40                     | 121%    | ns               | 5.94 $\pm$ 3.12                     | 83.3%   | ns               |
| MIP-1 $\beta$  | 38.56 $\pm$ 12.05          | 66.88 $\pm$ 30.38                   | 173%    | ns               | <b>67.95 <math>\pm</math> 34.92</b> | 176%    | 0.024            |
| MIP-3 $\alpha$ | 9.36 $\pm$ 7.49            | 5.22 $\pm$ 3.45                     | 55.8%   | ns               | <b>4.42 <math>\pm</math> 3.69</b>   | 47.1%   | 0.012            |
| TNF- $\alpha$  | 1.70 $\pm$ 0.47            | 1.69 $\pm$ 0.73                     | 99.4%   | ns               | <b>0.90 <math>\pm</math> 0.53</b>   | 52.9%   | 0.0012           |
